# Supplementary material for: The effects of coagulation factors on the risk of endometriosis: a Mendelian randomization study
Source: PubMed Central journal article supplement (PMC10210381; doi:10.1186/s12916-023-02881-z), 2023-05-25
Supplement: 12916_2023_2881_MOESM2_ESM.pdf [file 12916_2023_2881_MOESM2_ESM.pdf]

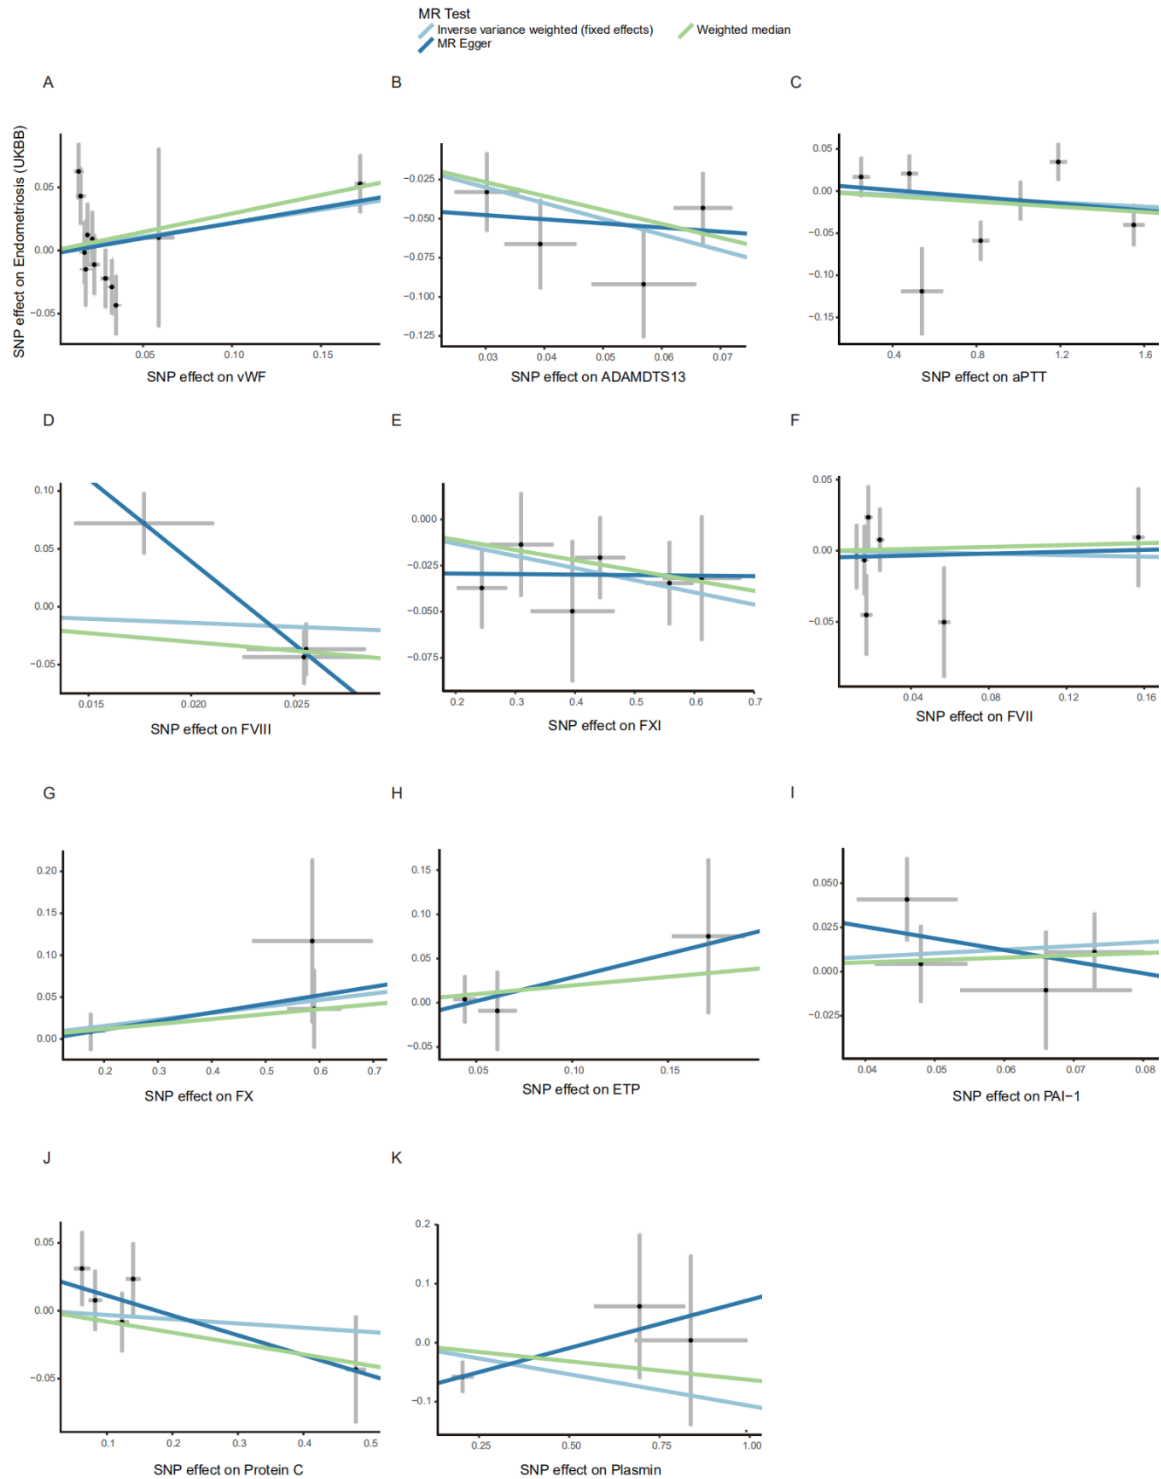

**Figure S1. Scatter plots for MR analyses of the causal effect of 11 coagulation factors on endometriosis in UK Biobank.**

The MR analyses were conducted using the fixed-effect inverse variance weighted, weighted mean, and MR-Egger. The slope of each line corresponding to the estimated MR effect per method. Error bars around each SNP are 95% confidence intervals. **(A)** vWF, **(B)** ADAMTS13, **(C)** aPTT, **(D)** FVIII, **(E)** FXI, **(F)** FVII, **(G)** FX, **(H)** ETP, **(I)** PAI-1, **(J)** protein C, **(K)** plasmin.

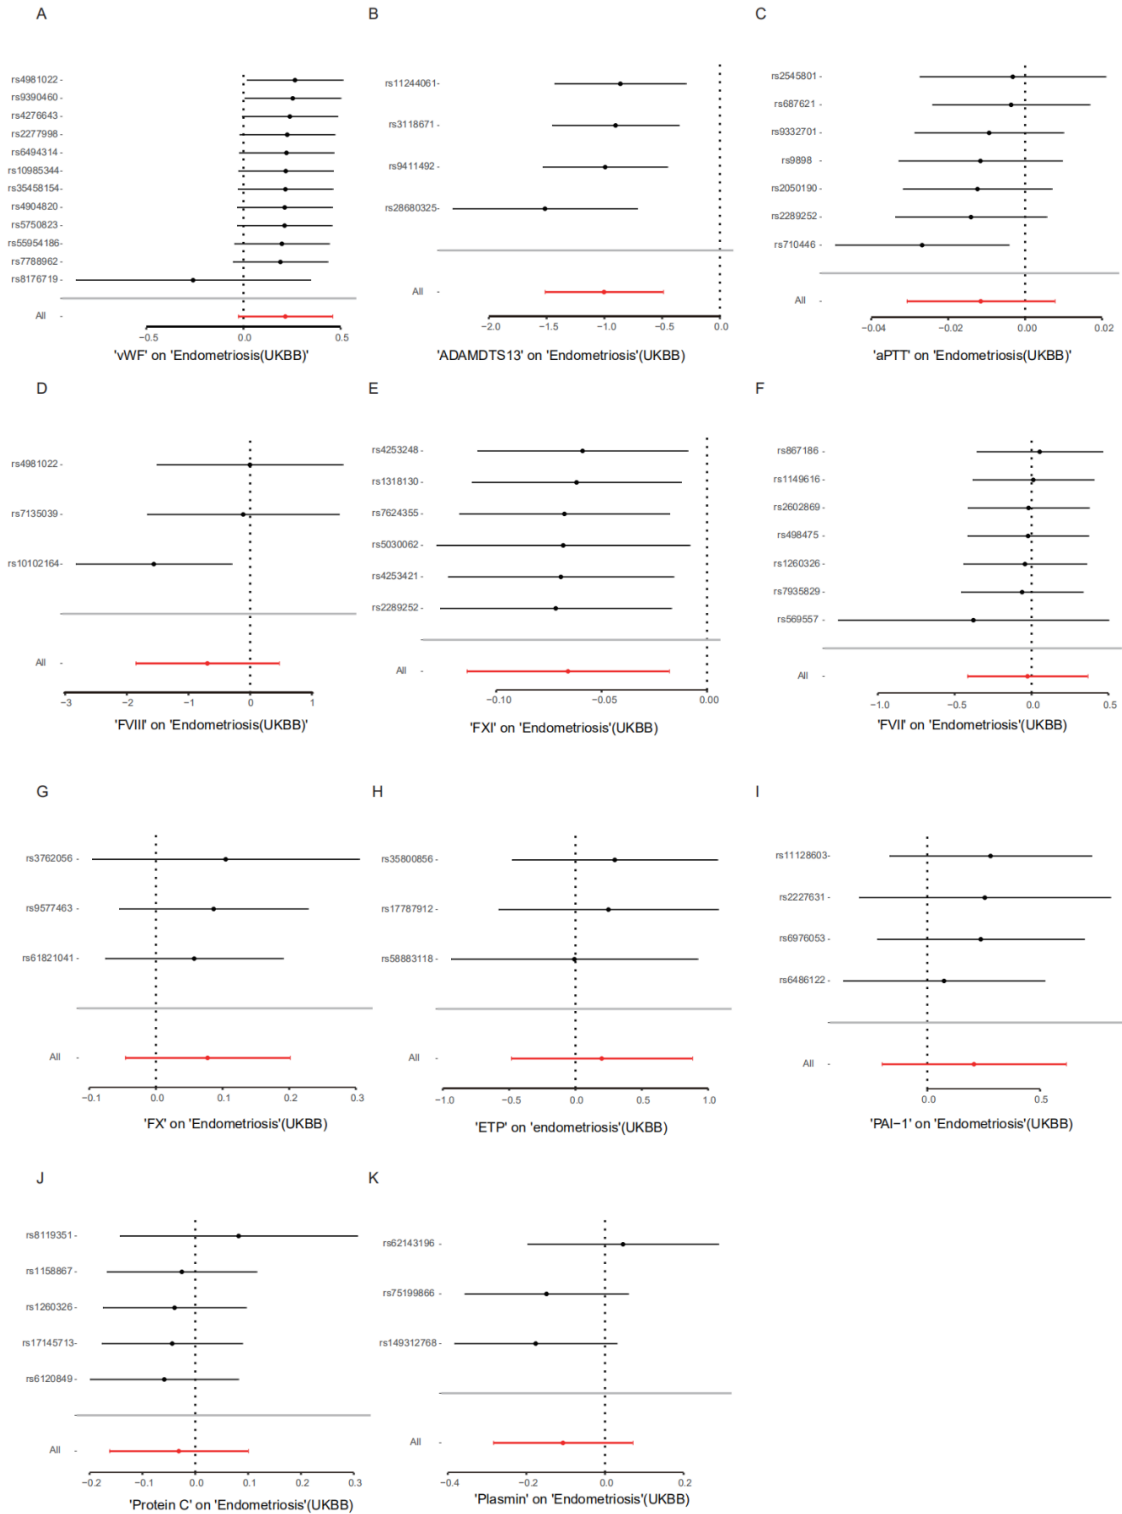

**Figure S2. Plots of leave-one-out analyses for the causal associations in UK Biobank.**

Forest plots depicting causal estimates of 11 coagulation factors on endometriosis by excluding each instrumental variable in turn. The horizontal bars represent beta value and its 95% confidence intervals (CI) of causal estimates. (A) vWF, (B) ADAMTS13, (C) aPTT, (D) FVIII, (E) FXI, (F) FVII, (G) FX, (H) ETP, (I) PAI-1, (J) protein C, (K) plasmin.

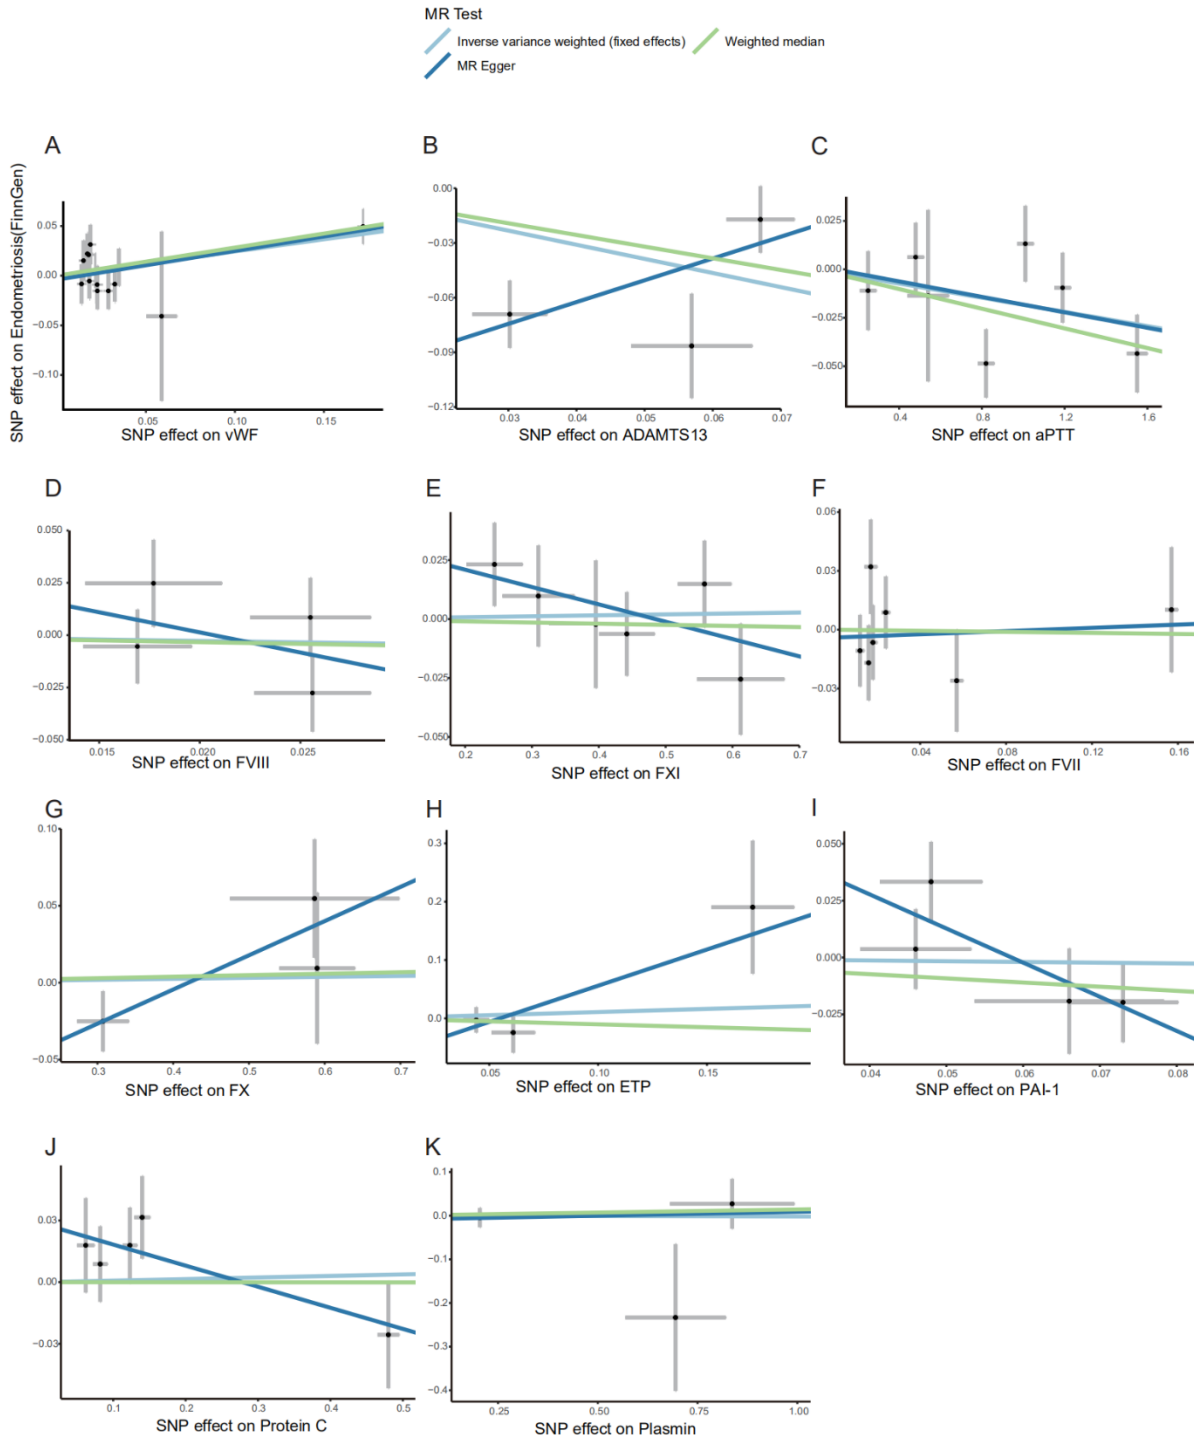

**Figure S3. Scatter plots for MR analyses of the causal effect of 11 coagulation factors on endometriosis in FinnGen cohort.**

The MR analyses were conducted using the fixed-effect inverse variance weighted, weighted mean, and MR-Egger. The slope of each line corresponding to the estimated MR effect per method. Error bars around each SNP are 95% confidence intervals. **(A)** vWF, **(B)** ADAMTS13, **(C)** aPTT, **(D)** FVIII, **(E)** FXI, **(F)** FVII, **(G)** FX, **(H)** ETP, **(I)** PAI-1, **(J)** protein C, **(K)** plasmin.

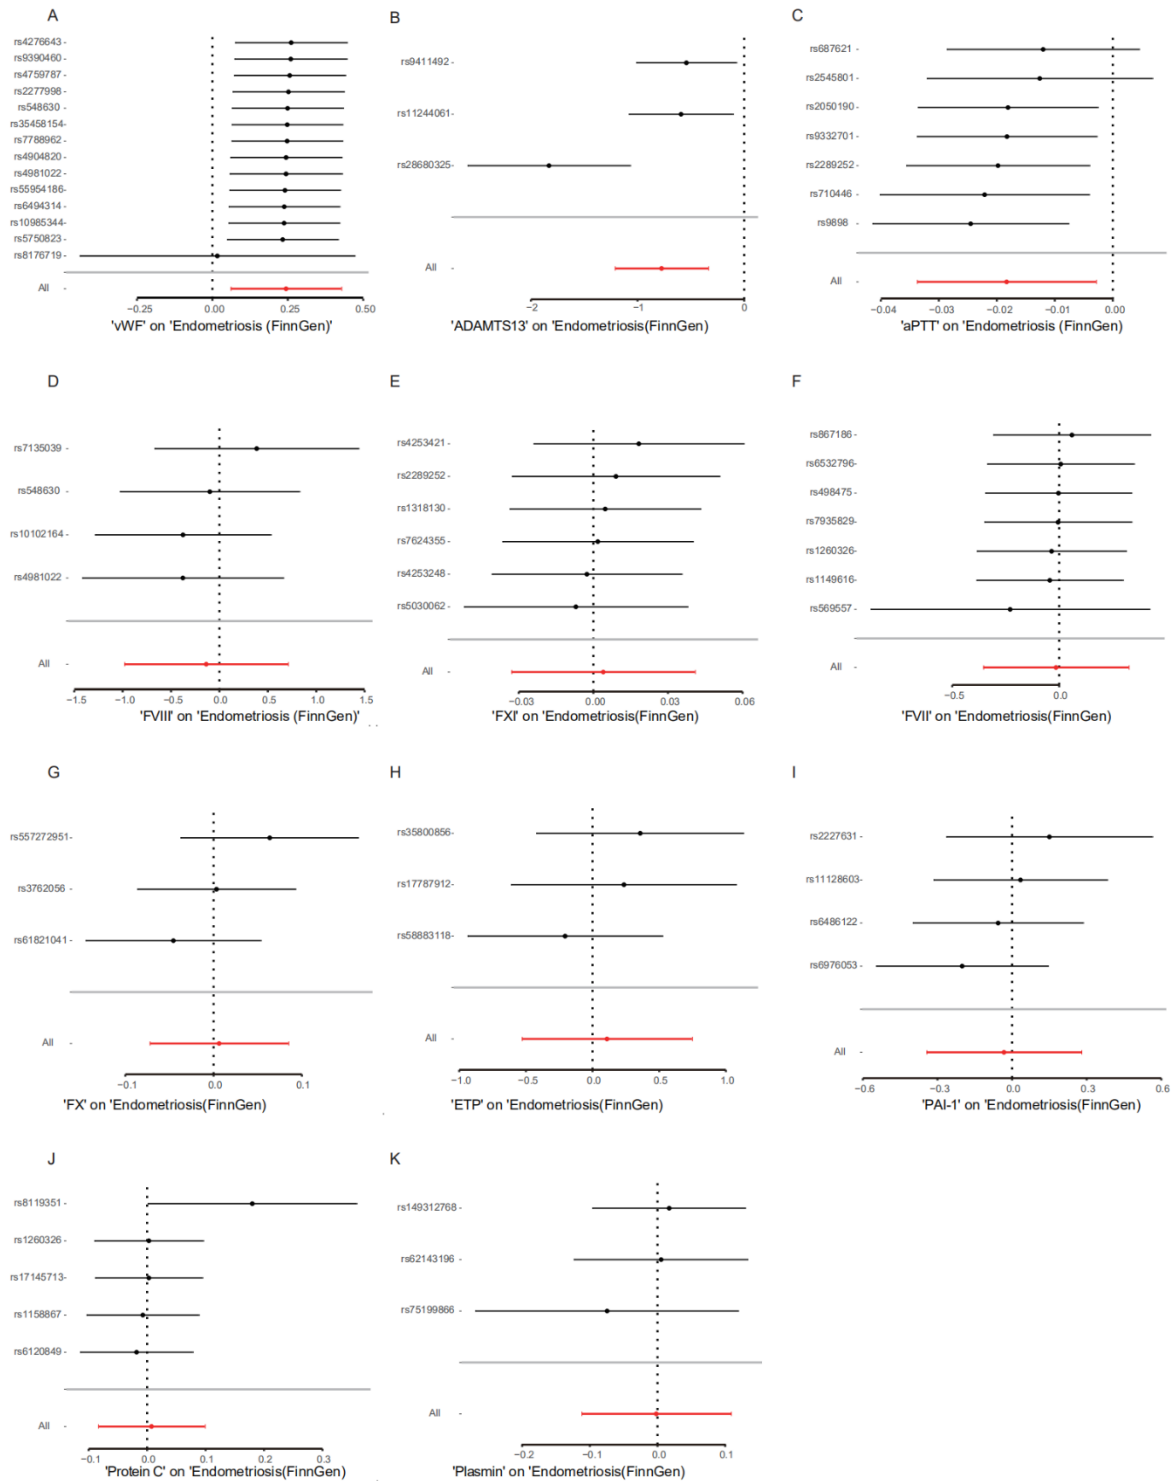

**Figure S4. Plots of leave-one-out analyses for the causal associations in FinnGen.**

Forest plots depicting causal estimates of 11 coagulation factors on endometriosis by excluding each instrumental variable in turn. The horizontal bars represent beta value and its 95% confidence intervals (CI) of causal estimates. **(A)** vWF, **(B)** ADAMTS13, **(C)** aPTT, **(D)** FVIII, **(E)** FXI, **(F)** FVII, **(G)** FX, **(H)** ETP, **(I)** PAI-1, **(J)** protein C, **(K)** plasmin.

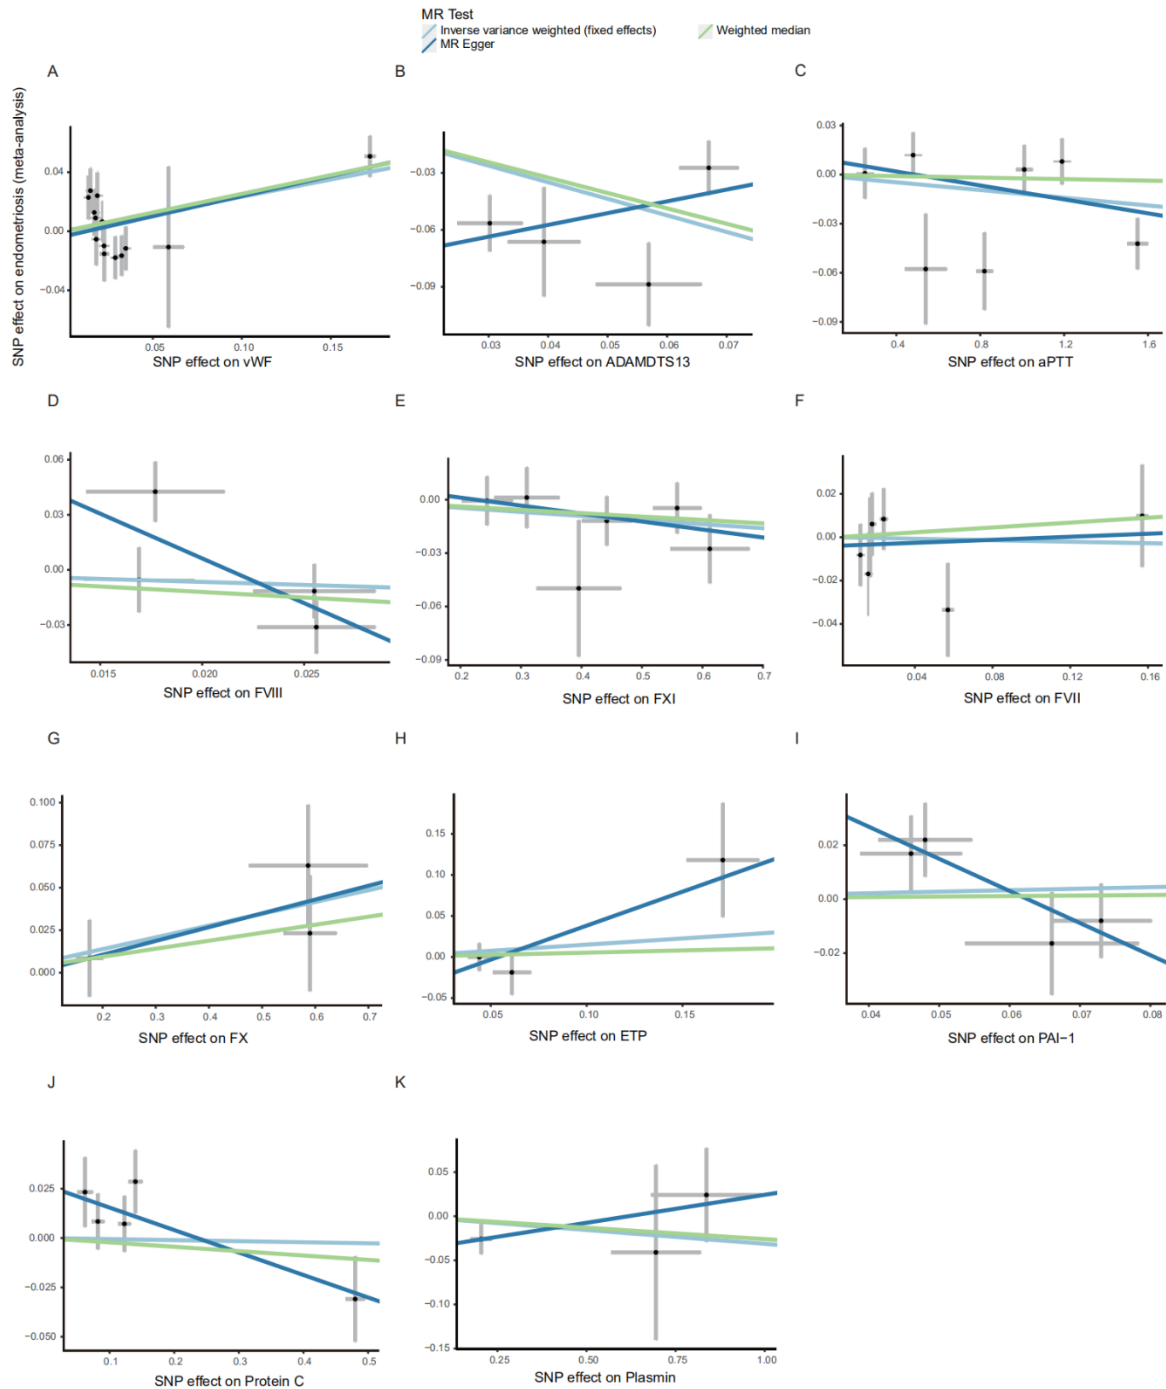

**Figure S5. Scatter plots for MR analyses of the causal effect of 11 coagulation factors on endometriosis in a meta-analysis.**

The MR analyses were conducted using the fixed-effect inverse variance weighted, weighted mean, and MR-Egger. The slope of each line corresponding to the estimated MR effect per method. Error bars around each SNP are 95% confidence intervals. (A) vWF, (B) ADAMTS13, (C) aPTT, (D) FVIII, (E) FXI, (F) FVII, (G) FX, (H) ETP, (I) PAI-1, (J) protein C, (K) plasmin.

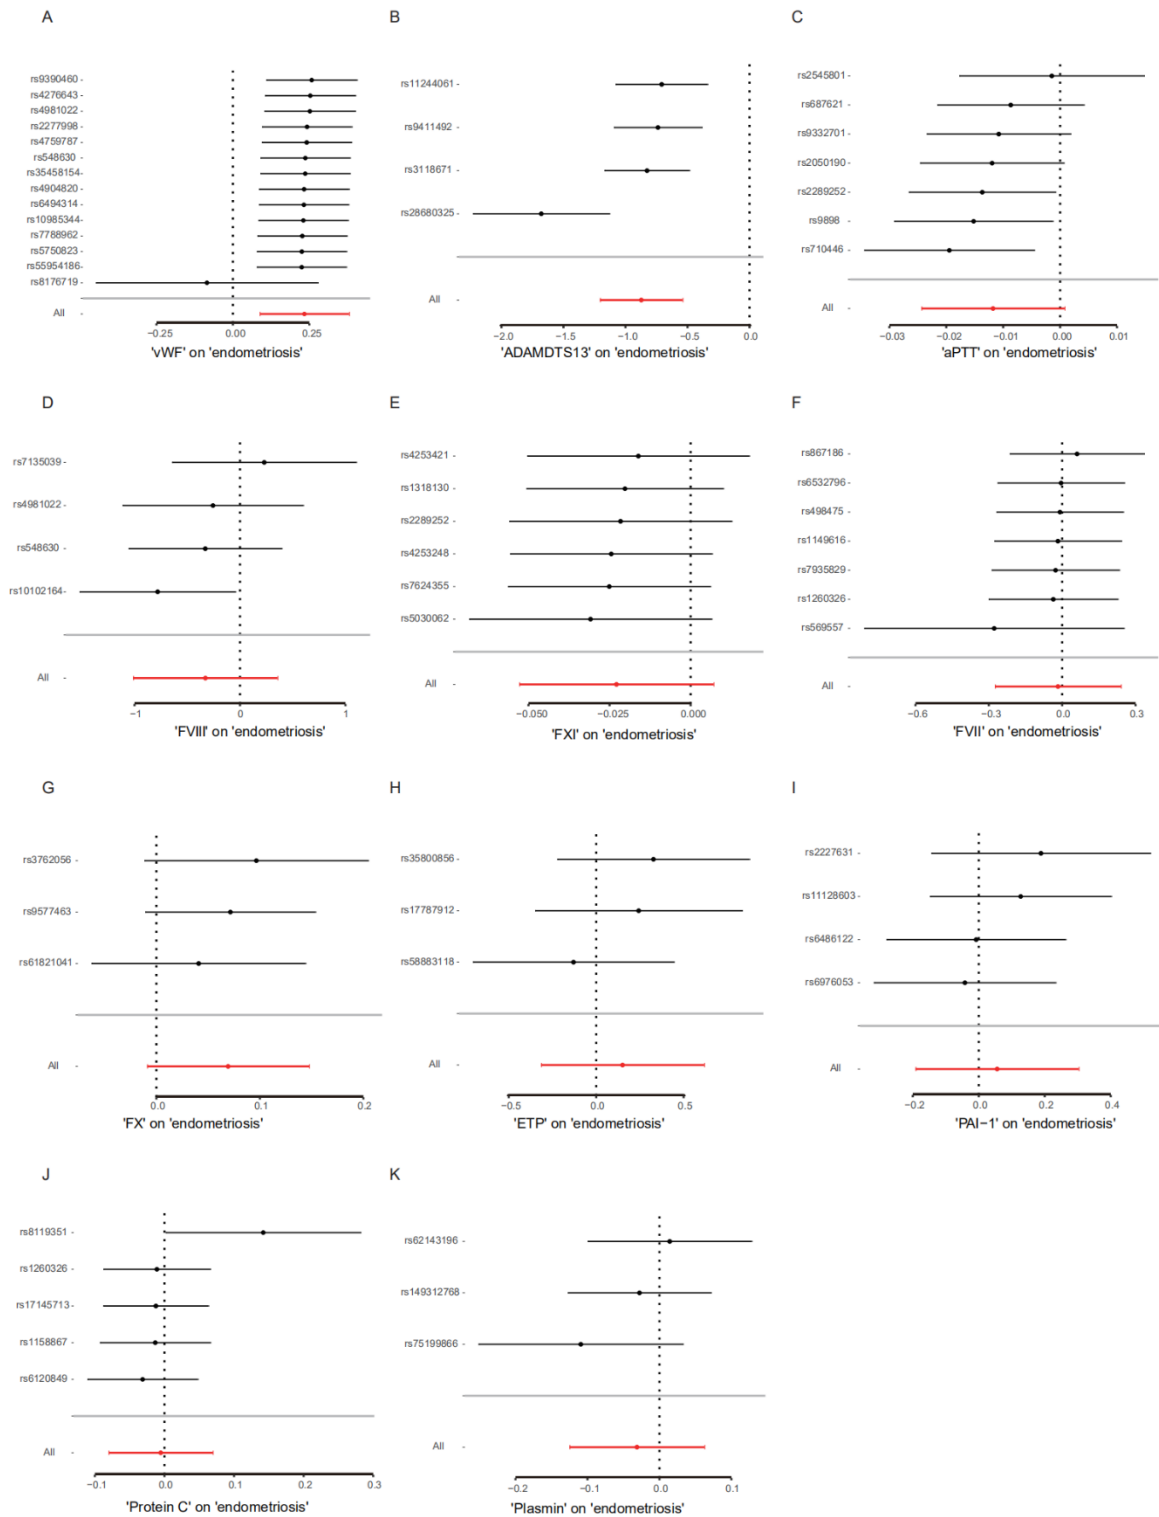

**Figure S6. Plots of leave-one-out analyses for the causal associations in the meta-analysis.**

Forest plots depicting causal estimates of 11 coagulation factors on endometriosis by excluding each instrumental variable in turn. The horizontal bars represent beta value and its 95% confidence intervals (CI) of causal estimates. **(A)** vWF, **(B)** ADAMTS13, **(C)** aPTT, **(D)**

FVIII, (E) FXI, (F) FVII, (G) FX, (H) ETP, (I) PAI-1, (J) protein C, (K) plasmin.
